# Supplementary material for: Modifications in coordination structure of Mg[TFSA]2-based supporting salts for high-voltage magnesium rechargeable batteries
Source: Royal Society of Chemistry journal article supplement (doi:10.1039/c9cp01400d), 2019-01-01
Supplement: c9cp01400d1.pdf [file c9cp01400d1.pdf]

*Supporting Information for*

# ***Modifications in Coordination Structure of Mg[TFSA]<sub>2</sub>-Based Supporting Salts for High-Voltage Magnesium Rechargeable Batteries***

*Toshihiko Mandai,<sup>1,2,§,\*</sup> Kenji Tatesaka,<sup>1</sup> Kenya Soh,<sup>3</sup> Hyuma Masu,<sup>4</sup> Ashu Choudhary,<sup>5</sup> Yoshitaka Tateyama,<sup>2,5</sup> Ryuta Ise,<sup>6</sup> Hiroaki Imai,<sup>6</sup> Tatsuya Takeguchi,<sup>1</sup> and Kiyoshi Kanamura<sup>3</sup>*

<sup>1</sup>Department of Chemistry and Biological Sciences, Faculty of Science and Engineering, Iwate University, Ueda 4-3-5, Morioka 020-8551, Japan

<sup>2</sup>Global Research Center for Environment and Energy based on Nanomaterials Science (GREEN), National Institute for Materials Science (NIMS), 1-1 Namiki, Tsukuba, Ibaraki 305-0044, Japan

<sup>3</sup>Department of Applied Chemistry, Tokyo Metropolitan University, 1-1 Minami-Osawa, Hachioji, Tokyo 192-0397, Japan

<sup>4</sup>Center for Analytical Instrumentation, Chiba University, 1-33 Yayoi-cho, Inage-ku, Chiba 263-8522, Japan

<sup>5</sup>Center for Materials Research by Information Integration (CMI2), Research and Services Division of Materials Data and Integrated System (MaDIS), National Institute for Materials Science (NIMS), 1-2-1 Sengen, Tsukuba, Ibaraki, 305-0047, Japan

<sup>6</sup>Department of Applied Chemistry, Faculty of Science and Technology, Keio University, 3-14-1 Hiyoshi, Kohoku-ku, Yokohama 223-8522, Japan

<sup>§</sup>Present address: Research Center for Energy and Environmental Materials, National Institute for Materials Science (NIMS), 1-1 Namiki, Tsukuba, Ibaraki 305-0044, Japan

## CORRESPONDING AUTHOR FOOTNOTES

Telephone: +81-29-860-4464, E-mail: [MANDAI.Toshihiko@nims.go.jp](mailto:MANDAI.Toshihiko@nims.go.jp)

Table S1. Crystallographic data of [Mg(G4)(DPSO<sub>2</sub>)<sub>2</sub>][TFSA]<sub>2</sub>, [Mg(EIm)<sub>6</sub>][TFSA]<sub>2</sub>, [Mg(G4)(MIm)<sub>2</sub>][TFSA]<sub>2</sub>, and [Mg(DMSO)<sub>6</sub>][TFSA]<sub>2</sub>.

|                                                    | [Mg(G4)(DPSO <sub>2</sub> ) <sub>2</sub> ][TFSA] <sub>2</sub>                                   | [Mg(EIm) <sub>6</sub> ][TFSA] <sub>2</sub>                                                      | [Mg(G4)(MIm) <sub>2</sub> ][TFSA] <sub>2</sub>                                                                 | [Mg(DMSO) <sub>6</sub> ][TFSA] <sub>2</sub>                                                      |
|----------------------------------------------------|-------------------------------------------------------------------------------------------------|-------------------------------------------------------------------------------------------------|----------------------------------------------------------------------------------------------------------------|--------------------------------------------------------------------------------------------------|
| Chemical formula                                   | C <sub>26</sub> H <sub>50</sub> F <sub>12</sub> MgN <sub>2</sub> O <sub>17</sub> S <sub>6</sub> | C <sub>34</sub> H <sub>48</sub> F <sub>12</sub> MgN <sub>14</sub> O <sub>8</sub> S <sub>4</sub> | C <sub>44</sub> H <sub>68</sub> F <sub>24</sub> Mg <sub>2</sub> N <sub>12</sub> O <sub>26</sub> S <sub>8</sub> | C <sub>16</sub> H <sub>36</sub> F <sub>12</sub> MgN <sub>2</sub> O <sub>14</sub> S <sub>10</sub> |
| Formula weight                                     | 1107.35                                                                                         | 1161.37                                                                                         | 1942.20                                                                                                        | 1053.38                                                                                          |
| Crystal system                                     | Monoclinic                                                                                      | Monoclinic                                                                                      | Triclinic                                                                                                      | Triclinic                                                                                        |
| Space group                                        | <i>P</i> 2 <sub>1</sub> / <i>n</i>                                                              | <i>P</i> 2 <sub>1</sub> / <i>c</i>                                                              | <i>P</i>                                                                                                       | <i>P</i>                                                                                         |
| <i>a</i> / Å                                       | 16.5803(8)                                                                                      | 11.0919(5)                                                                                      | 14.2221(4)                                                                                                     | 8.3553(3)                                                                                        |
| <i>b</i> / Å                                       | 16.0637(7)                                                                                      | 11.1816(6)                                                                                      | 16.1560(4)                                                                                                     | 11.6440(4)                                                                                       |
| <i>c</i> / Å                                       | 18.4302(8)                                                                                      | 20.2849(11)                                                                                     | 20.0391(6)                                                                                                     | 12.2554(4)                                                                                       |
| <i>α</i> / °                                       | 90                                                                                              | 90                                                                                              | 96.153(2)                                                                                                      | 111.290(3)                                                                                       |
| <i>β</i> / °                                       | 107.544(5)                                                                                      | 98.442(5)                                                                                       | 109.150(2)                                                                                                     | 98.550(3)                                                                                        |
| <i>γ</i> / °                                       | 90                                                                                              | 90                                                                                              | 109.657(2)                                                                                                     | 100.341(3)                                                                                       |
| <i>V</i> / Å <sup>3</sup>                          | 4680.4(4)                                                                                       | 2488.6(2)                                                                                       | 3971.8(2)                                                                                                      | 1062.74(7)                                                                                       |
| <i>Z</i>                                           | 4                                                                                               | 2                                                                                               | 2                                                                                                              | 1                                                                                                |
| <i>D</i> <sub>calc</sub> / g cm <sup>-3</sup>      | 1.571                                                                                           | 1.550                                                                                           | 1.624                                                                                                          | 1.646                                                                                            |
| <i>μ</i> / mm <sup>-1</sup>                        | 0.419                                                                                           | 0.3106                                                                                          | 0.375                                                                                                          | 0.640                                                                                            |
| Temp. / °C                                         | -150                                                                                            | -150                                                                                            | -150                                                                                                           | -150                                                                                             |
| Reflections<br>collected                           | 64072                                                                                           | 31278                                                                                           | 81029                                                                                                          | 15050                                                                                            |
| Independent<br>reflection, <i>R</i> <sub>int</sub> | 12438, 0.1001                                                                                   | 6609, 0.0661                                                                                    | 19017, 0.0954                                                                                                  | 4901, 0.0613                                                                                     |
| <i>R</i> <sub>1</sub> [ <i>I</i> > 2σ( <i>I</i> )] | 0.0762                                                                                          | 0.0468                                                                                          | 0.0615                                                                                                         | 0.0440                                                                                           |
| <i>wR</i> <sub>2</sub> (all data)                  | 0.1972                                                                                          | 0.1251                                                                                          | 0.1842                                                                                                         | 0.1213                                                                                           |
| GooF                                               | 1.057                                                                                           | 1.021                                                                                           | 1.067                                                                                                          | 1.097                                                                                            |
| CCDC                                               | 1909206                                                                                         | 1900782                                                                                         | 1900781                                                                                                        | 1900780                                                                                          |

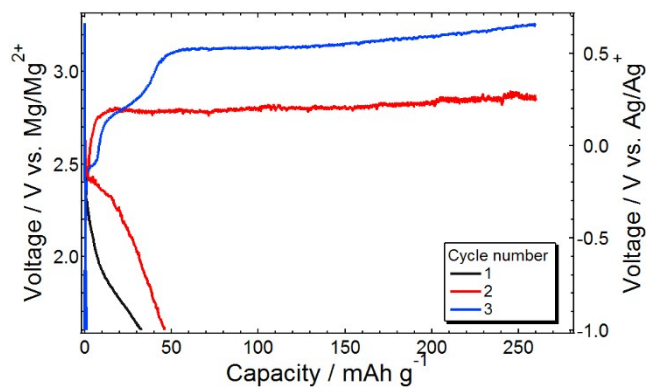

**Figure S1.** Capacity-unlimited galvanostatic charge–discharge curves of [Mg | hybrid electrolyte | MgCo<sub>2</sub>O<sub>4</sub>] cell measured at 100 °C.

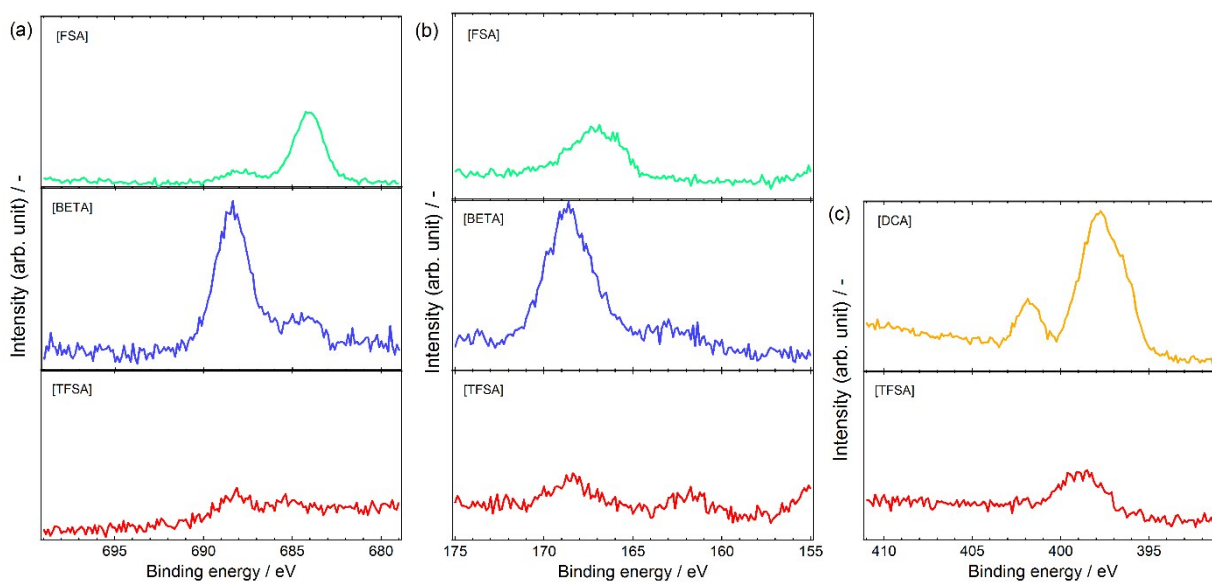

**Figure S2.** Narrow scan XPS spectra of the surface of magnesium strips soaked in a series of ILs with different amide-type anions for 24 h at 100 °C. (a) F1s, (b) S2p, and (c) N1s spectra.

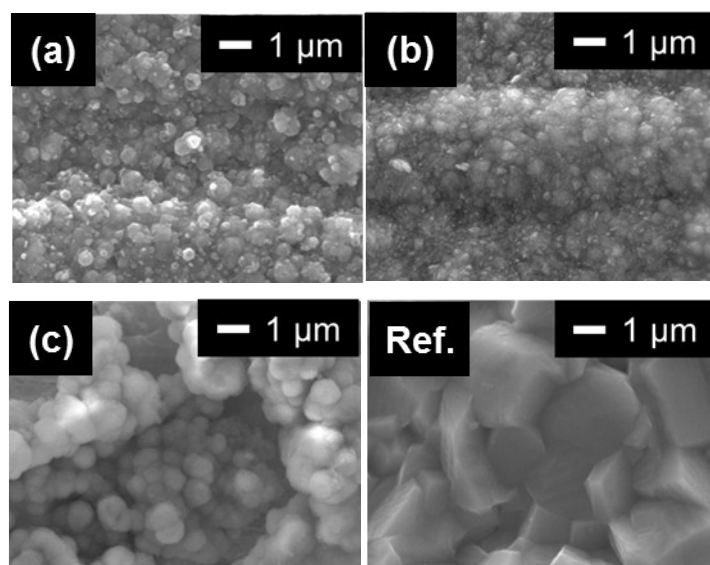

**Figure S3.** SEM images of deposits obtained from the mixture of Grignard reagent  $C_2H_5MgCl/THF$  with (a)  $[PYR_{13}][TFSA]$ , (b)  $[PYR_{13}][BETA]$ , and (c)  $[PYR_{13}][FSA]$  by potentiostatic polarization at  $-0.7 V$  vs.  $Mg^{2+}/Mg$  for 1 h at ambient temperature. The image of the deposits from (d)  $C_2H_5MgCl/THF$  was also included as a reference. The subsequent EDX analysis on the specific spots indicates the magnesium concentration to be 88.6, 44.1, 29.5, and 92.1% for the electrolytes with  $[TFSA]^-$ ,  $[BETA]^-$ ,  $[FSA]^-$ , and that without any ILs, respectively.

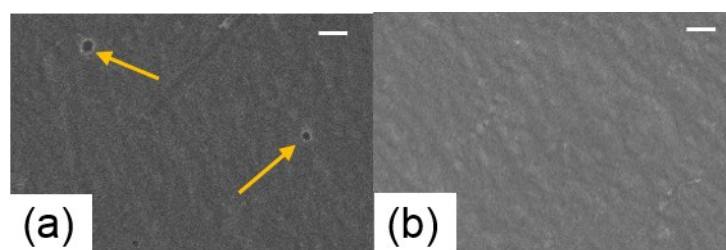

**Figure S4.** SEM images of Al current collectors after polarization at 3.0 V for 1 h in (a)  $0.5 \text{ mol dm}^{-3}$  hybrid  $Mg[TFSA]_2/G4-[PYR_{13}][TFSA]$  and (b)  $0.5 \text{ mol dm}^{-3}$   $[Mg(G4)][TFSA]_2/[PYR_{13}][TFSA]$ . The scale bars in each figure indicate 10  $\mu m$ . Arrows in the SEM images point to pits generated by anodic dissolution.

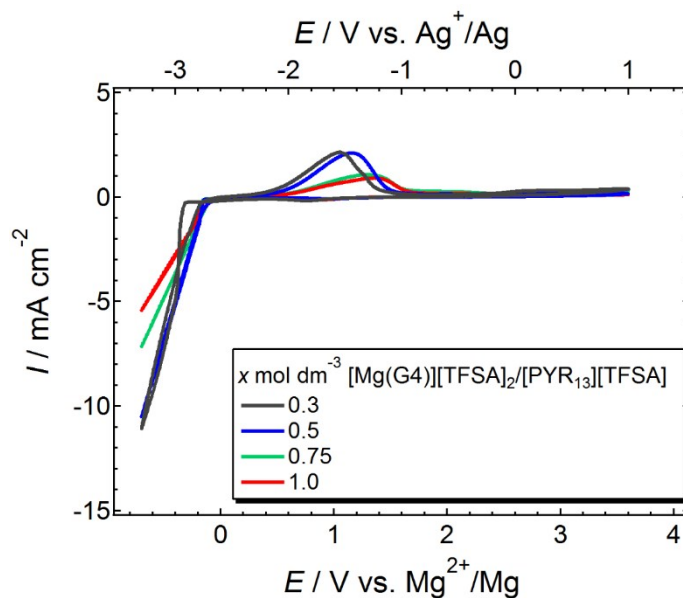

**Figure S5.** Concentration dependence of electrochemical activity for  $[\text{Mg}(\text{G4})][\text{TFSA}]_2/[\text{PYR}_{13}][\text{TFSA}]$  on Pt electrode at a scan rate of  $50 \text{ mV s}^{-1}$  at  $100 \text{ }^\circ\text{C}$ .

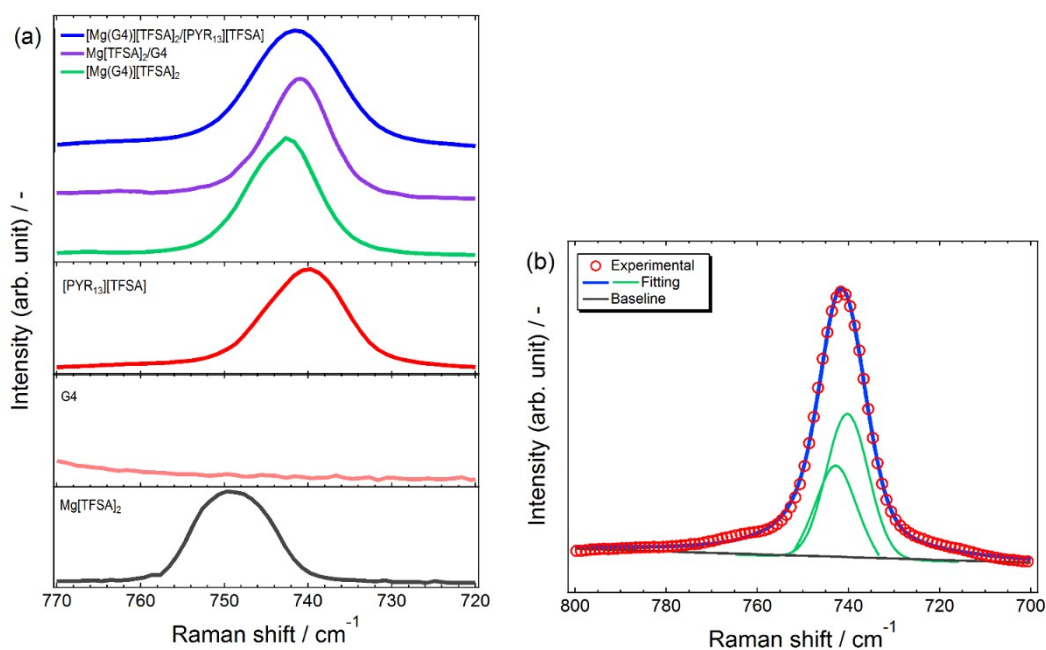

**Figure S6.** (a) Raman spectra of the studied electrolytes and the ingredients recorded at ambient temperature.

The spectral range was adopted for the coordination state of  $[\text{TFSA}]^-$  ( $720\text{--}770 \text{ cm}^{-1}$ ). (b) Result of spectral

deconvolution for  $[\text{Mg}(\text{G4})][\text{TFSA}]_2/[\text{PYR}_{13}][\text{TFSA}]$  by using Voigt function. The spectrum was deconvoluted

into two components located at  $739$  and  $744 \text{ cm}^{-1}$ .

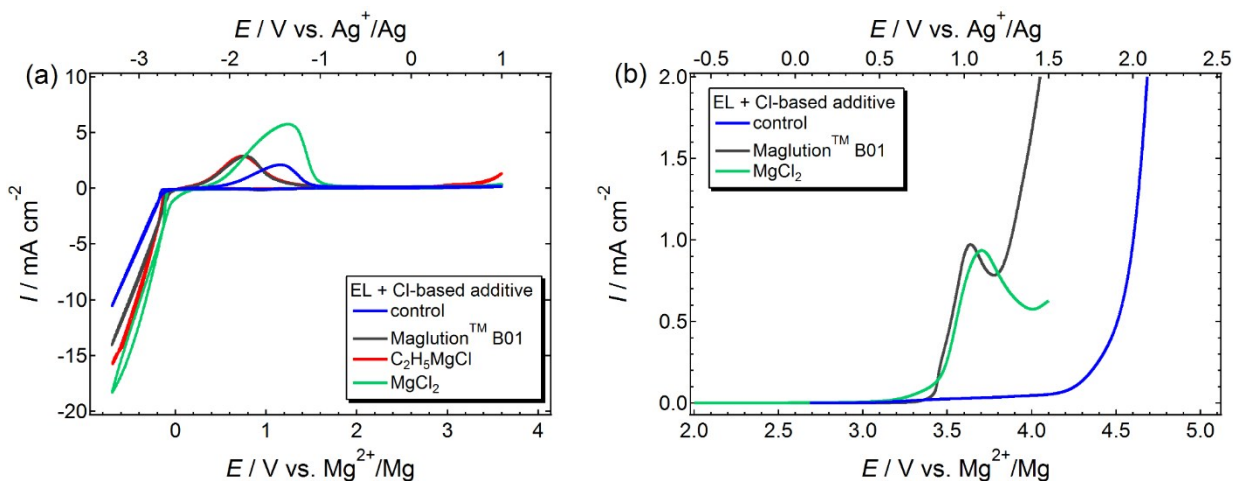

**Figure S7.** (a) CVs and (b) LSVs of  $0.5 \text{ mol dm}^{-3} [\text{Mg}(\text{G4})][\text{TFSA}]_2/[\text{PYR}_{13}][\text{TFSA}]$  with Cl-based additives.

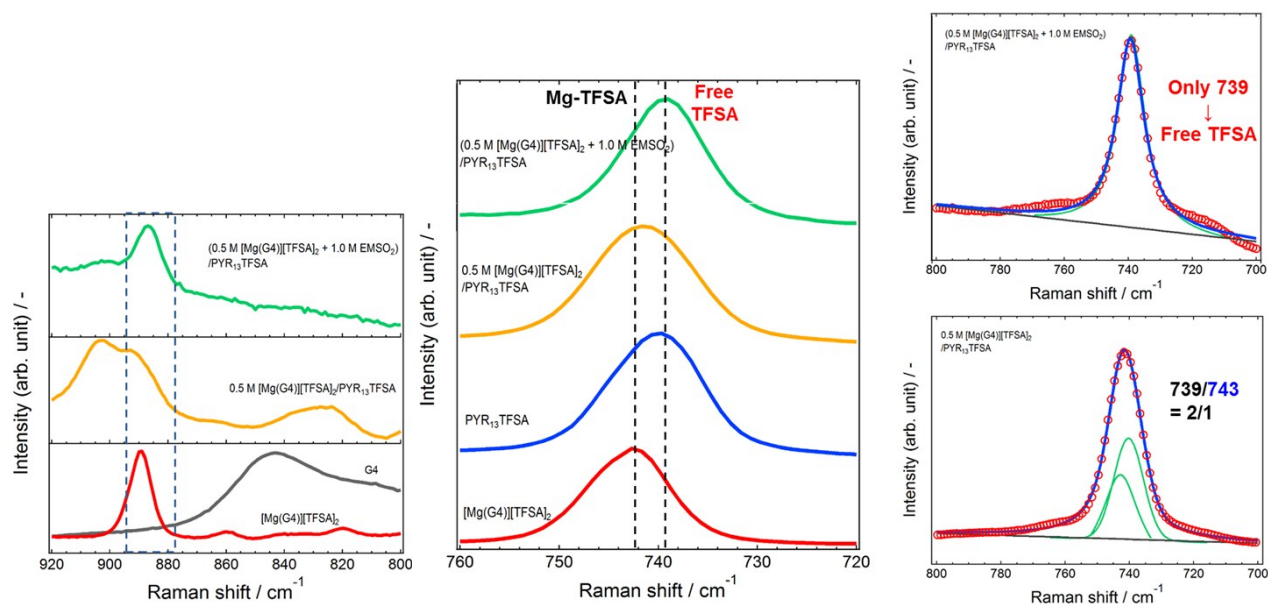

**Figure S8.** Raman spectra of the IL-based electrolytes incorporating the modified  $\text{Mg}[\text{TFSA}]_2$  complex as a supporting salt recorded at ambient temperature. The spectral range was adopted for the coordination state of G4 (left: 920–800  $\text{cm}^{-1}$ ) and  $[\text{TFSA}]^-$  (center: 720–770  $\text{cm}^{-1}$ ). Result of spectral deconvolution for (upper right)  $[\text{Mg}(\text{G4})(\text{EMSO}_2)_2][\text{TFSA}]_2/[\text{PYR}_{13}][\text{TFSA}]$  and (lower right)  $[\text{Mg}(\text{G4})][\text{TFSA}]_2/[\text{PYR}_{13}][\text{TFSA}]$  by using Voigt function.

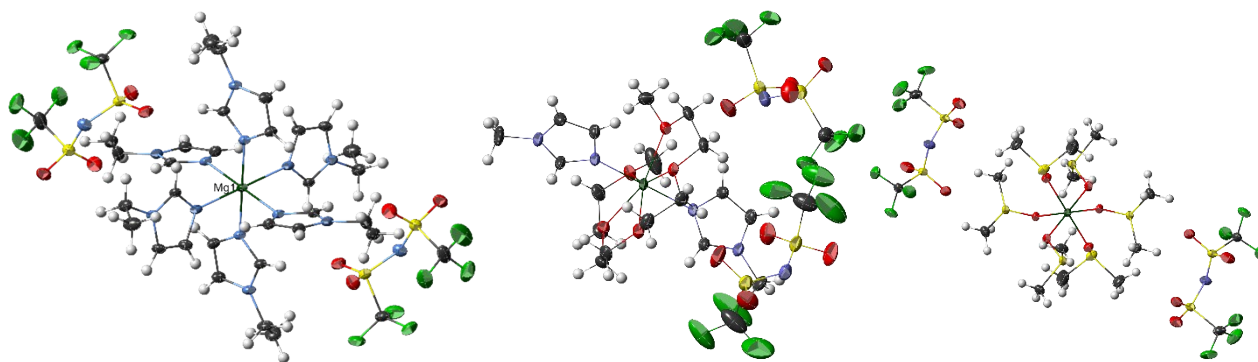

**Figure S9.** Thermal ellipsoid models of (left)  $[\text{Mg}(\text{EtIm})_6][\text{TFSA}]_2$ , (center)  $[\text{Mg}(\text{G4})(\text{MIm})_2][\text{TFSA}]_2$ , and (right)  $[\text{Mg}(\text{DMSO})_6][\text{TFSA}]_2$ . The ellipsoids of non-hydrogen atoms are drawn at 50% probability level, while isotropic hydrogen atoms are represented by arbitrary spheres. Disordered atoms are not shown here. Dark green, Mg; grey, C; white, H; red, O; light green, F; light blue, N; yellow, S.

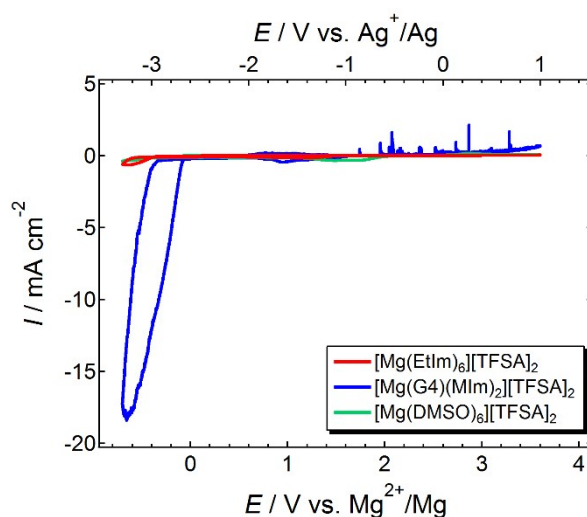

**Figure S10.** CVs of  $[\text{Mg}(\text{EtIm})_6][\text{TFSA}]_2$ ,  $[\text{Mg}(\text{G4})(\text{MIm})_2][\text{TFSA}]_2$  and  $[\text{Mg}(\text{DMSO})_6][\text{TFSA}]_2$  complexes recorded on Pt working electrode with a scan rate of  $50 \text{ mV s}^{-1}$  at  $150 \text{ }^\circ\text{C}$ .



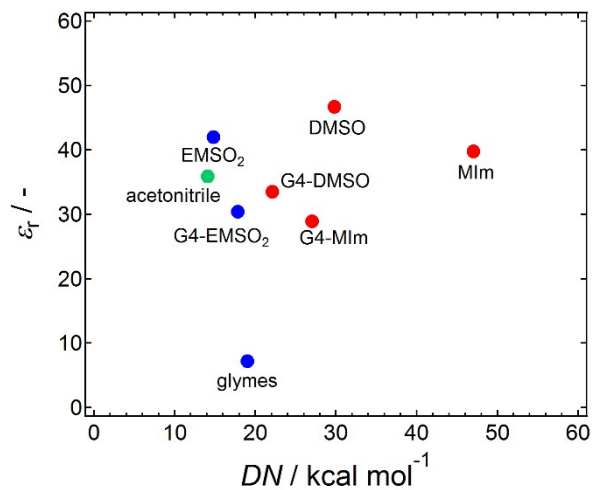

**Figure S11.** Mapping of  $DN$ s and dielectric constants ( $\epsilon_r$ ) for different ligands. The values for mixed ligand systems were derived from the simple mixture model. Ligands with  $DN$ s less than  $20 \text{ kcal mol}^{-1}$  (blue) would impart electrochemical magnesium plating/stripping activity for  $\text{Mg}[\text{TFSA}]_2$ -based electrolytes while those with  $DN$ s over  $20 \text{ kcal mol}^{-1}$  (red) would make complexes inactive. Acetonitrile is known to decompose at  $-0.2 \text{ V vs. Mg}^{2+}/\text{Mg}$  but can be regarded as an effective ligand since the  $\text{Mg}[\text{TFSA}]_2/\text{acetonitrile}$  electrolyte supports reversible magnesianation/de-magnesianation of  $\text{Bi}/\text{Mg}_3\text{Bi}_2$  (green) (ref. No. 69 of the main manuscript).
